# Supplementary material for: Human placental transcriptome shows sexually dimorphic gene expression and responsiveness to maternal dietary n-3 long-chain polyunsaturated fatty acid intervention during pregnancy
Source: PubMed Central journal article supplement (PMC4232618; doi:10.1186/1471-2164-15-941), 2014-10-27
Supplement: 12864_2014_6647_MOESM1_ESM.pdf [file 12864_2014_6647_MOESM1_ESM.pdf]

## Supplemental Text S1

### Expression analysis of PPAR $\beta/\delta$ and PPAR $\gamma$ target genes and genes involved in lipid metabolism

Studies have often identified as dietary n-3 LCPUFAs supplementation effects expression changes for target genes of the transcription factors peroxisome proliferator-activated receptors (PPAR) and genes in lipid metabolism, especially in white adipose tissue and liver and corresponding cell culture models (86-93). Moreover, it has been shown that the activity for PPAR $\alpha$ ,  $\beta/\delta$  and  $\gamma$  can be modulated by LCPUFAs and their metabolites in various tissues (89, 94, 95), and in gene knock-out mice the crucial roles of PPAR $\gamma$  and PPAR $\beta/\delta$  in placental development were demonstrated (96). In our study, placental microarray data sets were used to assess whether the n-3 LCPUFA intervention impacts the expression of similar genes or PPAR target genes which were extracted from the literature, such as 115

genes involved in lipid metabolism (89, 91, 93, 97, 98), 37 PPAR $\beta/\delta$  target genes and 69 PPAR $\gamma$  target genes (94, 95). Due to absence of probes or very low hybridization intensities, 54 expressed genes, involved in lipid metabolism, qualified for comparison with our data sets. Thereof, only lipoprotein lipase (*LPL*) in data set (N3-F vs. Con-F) and medium-chain acyl-CoA dehydrogenase (*ACADM*) in data set (N3-M+N3-F vs. Con-M+F) showed significantly differential mRNA expression (see Additional file 6/Table S5).

With regard to PPAR $\beta/\delta$  and PPAR $\gamma$ -mediated gene expression, the genes for the transcription factors PPAR $\beta/\delta$  and PPAR $\gamma$  were not differentially expressed. For PPAR $\beta/\delta$  target genes, only Kruppel-like factor 11 (*KLF11*) showed significantly differential gene expression, whereas the genes for perilipin 2 (*PLIN2 / ADRP*) and hydroxysteroid (11-beta) dehydrogenase 1 (*HSD11B1*), known as PPAR  $\beta/\delta$  target genes in trophoblast cells (99, 100), were not regulated (see Additional file 7/Table S6). Moreover, for PPAR $\gamma$  target genes, only *IGFBP1* and *LPL* showed significantly differential mRNA expression (see Additional file 8/Table S7). Comparing placentas of the intervention group to control group, *LPL* mRNA was higher expressed in female than male placentas upon intervention, whereas *IGFBP1* mRNA levels were significantly higher in male placentas upon intervention. PPAR $\gamma$  target genes mucin 1, cell surface

associated (*MUC1*), *ADRP*, *SLC27A1* (*FATP1*) and *SLC27A4* (*FATP4*), which have been detected in placental tissues (101), did not show significant regulations in the microarray data sets upon the intervention.

## Supplemental References

86. Al Hasani H, Joost HG: **Nutrition-/diet-induced changes in gene expression in white adipose tissue.** *Best Pract Res Clin Endocrinol Metab.* 2005, **19**:589-603.
87. Deckelbaum RJ, Worgall TS, Seo T: **n-3 fatty acids and gene expression.** *Am J Clin Nutr.* 2006, **83**:1520S-1525S.
88. Flachs P, Rossmeisl M, Bryhn M, Kopecky J. **Cellular and molecular effects of n-3 polyunsaturated fatty acids on adipose tissue biology and metabolism.** *Clin Sci (Lond).* 2009, **116**:1-16.
89. Jump DB, Botolin D, Wang Y, Xu J, Demeure O, Christian B: **Docosahexaenoic acid (DHA) and hepatic gene transcription.** *Chem Phys Lipids.* 2008, **153**:3-13.
90. Raclot T, Oudart H: **Selectivity of fatty acids on lipid metabolism and gene expression.** *Proc Nutr Soc.* 1999, **58**:633-646.
91. Sampath H, Ntambi JM: **Polyunsaturated fatty acid regulation of genes of lipid metabolism.** *Annu Rev Nutr.* 2005, **25**:317-340.
92. Simopoulos AP: **Human requirement for N-3 polyunsaturated fatty acids.** *Poult Sci.* 2000, **79**:961-970.
93. Vemuri M, Kelley DS 2007: **The effects of dietary fatty acids on lipid metabolism.** In: Chow CK (ed). *Fatty acids in foods and their health implications.* CRC Press Taylor and Francis Group, Boca Raton; FL:591-630
94. Adhikary T, Kaddatz K, Finkernagel F, Schonbauer A, Meissner W, Scharfe M, Jarek M, Blocker H, Muller-Brusselbach S, Muller R: **Genomewide analyses define different modes of transcriptional regulation by peroxisome proliferator-activated receptor-beta/delta (PPARbeta/delta).** *PLoS One.* 2011, **6**:e16344.
95. Keen HL, Halabi CM, Beyer AM, de Lange WJ, Liu X, Maeda N, Faraci FM, Casavant TL, Sigmund CD: **Bioinformatic analysis of gene sets regulated by ligand-activated and dominant-negative peroxisome proliferator-activated receptor gamma in mouse aorta.** *Arterioscler Thromb Vasc Biol.* 2010, **30**:518-525.
96. Barak Y, Sadovsky Y, Shalom-Barak T: **PPAR Signaling in Placental Development and Function.** *PPAR Res.* 2008, **2008**:142082.

97. Johnsen GM, Weedon-Fekjaer MS, Tobin KA, Staff AC, Duttaroy AK: **Long-chain polyunsaturated fatty acids stimulate cellular fatty acid uptake in human placental choriocarcinoma (BeWo) cells.** *Placenta*. 2009, **30**:1037-1044.
98. Oh DY, Talukdar S, Bae EJ, Imamura T, Morinaga H, Fan W, Li P, Lu WJ, Watkins SM, Olefsky JM: **GPR120 is an omega-3 fatty acid receptor mediating potent anti-inflammatory and insulin-sensitizing effects.** *Cell*. 2010, **142**:687-698.
99. Julan L, Guan H, van Beek JP, Yang K: **Peroxisome Proliferator-Activated Receptor  $\alpha$  Suppresses 11 $\beta$ -Hydroxysteroid Dehydrogenase Type 2 Gene Expression in Human Placental Trophoblast Cells.** *Endocrinology*. 2005, **146**:1482-1490.
100. Nadra K, Anghel SI, Joye E, Tan NS, Basu-Modak S, Trono D, Wahli W, Desvergne B: **Differentiation of trophoblast giant cells and their metabolic functions are dependent on peroxisome proliferator-activated receptor beta/delta.** *Mol Cell Biol*. 2006, **26**:3266-3281.
101. Schaiff WT, Barak Y, Sadovsky Y: **The pleiotropic function of PPAR gamma in the placenta.** *Mol Cell Endocrinol*. 2006, **249**:10-15.

**Table S1: Clinical characteristics and LCPUFA biomarker of mothers and offspring in the population for DNA microarray analysis.**

|                                                        | Male offspring (M) |                          |                    | Female offspring (F) |                          |                            | Con-M vs. Con-F | P*           | P#           | P*#   |
|--------------------------------------------------------|--------------------|--------------------------|--------------------|----------------------|--------------------------|----------------------------|-----------------|--------------|--------------|-------|
|                                                        | n                  | Mean ± SD / Median (IQR) |                    | n                    | Mean ± SD / Median (IQR) |                            |                 |              |              |       |
| <b>Maternal characteristics</b>                        |                    |                          |                    |                      |                          |                            |                 |              |              |       |
| Maternal age (years)                                   | Con                | 3                        | 31.3 ± 2.5         | 4                    | 30.0 ± 3.7               |                            |                 | 0.589        | 0.125        | 0.299 |
|                                                        | N3                 | 5                        | 35.2 ± 5.2         | 4                    | 28.8 ± 5.6               |                            |                 |              |              |       |
| Primiparae <sup>‡</sup>                                | Con                | 3                        | 33.3% n: 1         | 4                    | 0.0% n: 0                | Fisher exact test<br>1.000 |                 |              |              |       |
|                                                        | N3                 | 5                        | 40.0% n: 2         | 4                    | 50.0% n: 2               |                            |                 |              |              |       |
| Weight before pregnancy (kg)                           | Con                | 3                        | 66.7 ± 10.0        | 4                    | 66.5 ± 5.4               |                            |                 | 0.804        | 0.320        | 0.303 |
|                                                        | N3                 | 5                        | 61.0 ± 7.1         | 4                    | 70.0 ± 10.9              |                            |                 |              |              |       |
| BMI before pregnancy (kg/m <sup>2</sup> ) <sup>†</sup> | Con                | 3                        | 21.3 (20.7 - 23.5) | 4                    | 24.5 (21.9 - 26.2)       |                            |                 | 0.881        | 0.139        | 0.690 |
|                                                        | N3                 | 5                        | 21.1 (20.4 - 23.6) | 4                    | 25.0 (20.9 - 27.7)       |                            |                 |              |              |       |
| Gestational weight gain <sup>†</sup> (kg)              | Con                | 3                        | 17.3 ± 0.6         | 4                    | 15.5 ± 4.8               |                            |                 | 0.418        | 0.518        | 0.132 |
|                                                        | N3                 | 5                        | 12.6 ± 4.0         | 4                    | 17.0 ± 3.7               |                            |                 |              |              |       |
| <b>Offspring characteristics</b>                       |                    |                          |                    |                      |                          |                            |                 |              |              |       |
| Gestational age (d)                                    | Con                | 3                        | 283.0 ± 6.6        | 4                    | 283.5 ± 3.4              |                            |                 | 0.717        | 0.493        | 0.363 |
|                                                        | N3                 | 5                        | 284.2 ± 2.7        | 4                    | 280.8 ± 4.2              |                            |                 |              |              |       |
| Placental weight (g) <sup>†</sup>                      | Con                | 3                        | 515.3 ± 91.1       | 4                    | 616.5 ± 20.6             |                            |                 | 0.063        | 0.407        | 0.067 |
|                                                        | N3                 | 5                        | 510.2 ± 103.6      | 4                    | 485.0 ± 35.5             |                            |                 |              |              |       |
| Birth weight (g)                                       | Con                | 3                        | 3490.0 ± 395.1     | 4                    | 3782.6 ± 185.5           |                            |                 | 0.450        | 0.636        | 0.120 |
|                                                        | N3                 | 5                        | 3611.0 ± 159.7     | 4                    | 3450.0 ± 333.4           |                            |                 |              |              |       |
| Weight 1 year (g)                                      | Con                | 3                        | 102577 ± 1110.4    | 4                    | 9522.5 ± 927.8           |                            |                 | 0.768        | 0.286        | 0.997 |
|                                                        | N3                 | 5                        | 100560 ± 1846.2    | 4                    | 9327.5 ± 639.9           |                            |                 |              |              |       |
| Birth weight percentile                                | Con                | 3                        | 36.3 ± 22.6        | 4                    | 70.0 ± 17.2              |                            |                 | 0.455        | 0.115        | 0.153 |
|                                                        | N3                 | 5                        | 44.2 ± 16.3        | 4                    | 46.0 ± 26.5              |                            |                 |              |              |       |
| Birth height (cm)                                      | Con                | 3                        | 51.7 ± 2.1         | 4                    | 51.5 ± 0.6               |                            |                 | 0.386        | 0.851        | 0.992 |
|                                                        | N3                 | 5                        | 52.4 ± 1.5         | 4                    | 52.3 ± 2.1               |                            |                 |              |              |       |
| Birth head circumference (cm)                          | Con                | 3                        | 35.0 ± 1.0         | 4                    | 35.3 ± 0.5               |                            |                 | 0.884        | 0.561        | 0.204 |
|                                                        | N3                 | 5                        | 35.4 ± 0.7         | 4                    | 34.8 ± 0.5               |                            |                 |              |              |       |
| Birth weight / length (g/cm)                           | Con                | 3                        | 67.7 ± 8.8         | 4                    | 73.4 ± 3.6               |                            |                 | 0.292        | 0.605        | 0.146 |
|                                                        | N3                 | 5                        | 68.9 ± 2.7         | 4                    | 66.1 ± 6.6               |                            |                 |              |              |       |
| Birth weight / placenta weight                         | Con                | 3                        | 6.8 ± 0.6          | 4                    | 6.1 ± 0.3                |                            |                 | 0.207        | 0.452        | 0.668 |
|                                                        | N3                 | 5                        | 7.3 ± 1.7          | 4                    | 7.2 ± 1.0                |                            |                 |              |              |       |
| <b>LCPUFA biomarker</b>                                |                    |                          |                    |                      |                          |                            |                 |              |              |       |
| n6/n3 LCPUFA ratio <sup>2</sup> RBC mat. P_15          | Con                | 3                        | 2.73 (2.16-2.98)   | 4                    | 2.79 (2.26-3.35)         |                            |                 | 0.594        | 0.363        | 0.530 |
|                                                        | N3                 | 5                        | 1.85 (1.80-5.24)   | 4                    | 2.79 (2.14-4.07)         |                            |                 |              |              |       |
| n6/n3 LCPUFA ratio <sup>2</sup> RBC mat. P_32          | Con                | 3                        | 2.02 (1.80-2.62)   | 4                    | 2.77 (2.32-7.61)         |                            |                 | <b>0.019</b> | 0.173        | 0.940 |
|                                                        | N3                 | 5                        | 1.32 (1.01-2.03)   | 4                    | 1.47 (1.35-4.40)         | 0.330                      | 0.319           | 0.068        | 0.091        |       |
| n-6/n-3 LCPUFA ratio <sup>2</sup> CB RBCs <sup>†</sup> | Con                | 3                        | 4.54 (3.86-4.79)   | 3                    | 5.54 (5.39-8.07)         |                            |                 | <b>0.003</b> | <b>0.003</b> | 0.533 |
|                                                        | N3                 | 5                        | 2.50 (2.30-3.04)   | 4                    | 4.37 (3.18-9.11)         | 0.060                      | <b>0.004</b>    | 0.058        | <b>0.009</b> |       |

Data are presented as n, mean ± SD or percentage for each of the four analysis groups (Con-M, Con-F, n3-M, n3-F). For quantitative variables the corresponding P values are calculated with two-way ANOVA (P\*, P#, P\*#). <sup>†</sup>Not normal distributed variables or variables that violated homoscedascity were presented as median (interquartile range IQR = 25<sup>th</sup>-75<sup>th</sup> percentile). Their corresponding P values were calculated with two-way ANOVA on ranks (P\*, P#, P\*#). In case of a significant two-way ANOVA P value, post-hoc tests (grey shaded) were conducted with Holm-Sidak test to adjust the significance level (Con-M vs. Con-F, n3-M vs. n3-F, n3-F vs. Con-F and n3-M vs. Con-M). <sup>‡</sup> For qualitative variables the Fisher exact test was used. P values < 0.05 were considered as significant and marked bold; P\* < 0.05 significant difference between the n-3 LCPUFA intervention and the control group, effect of the intervention, P# < 0.05 significant difference between male and female placentas, effect of offspring sex; P\*# < 0.05 significant interaction between sex and the intervention. <sup>1</sup>last measured value at booking minus self-reported weight before pregnancy, <sup>2</sup>n-6/n-3 LCPUFA ratio: (C20:2n-6 + C20:3n-6 + C20:4n-6 + C22:2n-6 + C22:4n-6 + C22:5n-6) / (C20:3n-3 + C20:4n-3 + C20:5n-3 + C22:3n-3 + C22:5n-3 + C22:6n-3); mat., maternal; CB, cord blood.

**Table S2: Clinical characteristics and LCPUFA biomarker of mothers and offspring in the subpopulation**

|                                                           | Male offspring (M) |                          |                  | Female offspring (F) |                          |                  | Con-M vs. Con-F | P*                       | P#                | P*#              |              |
|-----------------------------------------------------------|--------------------|--------------------------|------------------|----------------------|--------------------------|------------------|-----------------|--------------------------|-------------------|------------------|--------------|
|                                                           | n                  | Mean ± SD / Median (IQR) |                  | n                    | Mean ± SD / Median (IQR) |                  |                 |                          |                   |                  |              |
| <b>Maternal characteristics</b>                           |                    |                          |                  |                      |                          |                  |                 |                          |                   |                  |              |
| Maternal age (years)                                      | Con                | 9                        | 33.6 ± 3.4       |                      | 11                       | 32.0 ± 4.3       |                 |                          | 0.446             | 0.257            | 0.948        |
|                                                           | N3                 | 11                       | 32.6 ± 5.1       |                      | 10                       | 30.8 ± 5.1       |                 |                          |                   |                  |              |
| Primiparae <sup>‡</sup>                                   | Con                | 9                        | 44.4%            | n 4                  | 11                       | 45.5%            | n 5             | Chi-Square test<br>0.880 |                   |                  |              |
|                                                           | N3                 | 11                       | 54.5%            | n 6                  | 10                       | 60.0%            | n 6             |                          |                   |                  |              |
| Weight before pregnancy (kg)                              | Con                | 9                        | 60.9 ± 8.1       |                      | 11                       | 63.6 ± 8.2       |                 |                          | 0.941             | 0.061            | 0.415        |
|                                                           | N3                 | 11                       | 59.1 ± 6.4       |                      | 10                       | 65.7 ± 7.9       |                 |                          |                   |                  |              |
| BMI before pregnancy (kg/m <sup>2</sup> ) <sup>†</sup>    | Con                | 9                        | 21.0 (19.2-24.0) |                      | 11                       | 22.7 (20.9-25.5) |                 |                          | 0.652             | 0.080            | 0.962        |
|                                                           | N3                 | 11                       | 20.8 (20.1-22.3) |                      | 10                       | 21.9 (20.7-24.0) |                 |                          |                   |                  |              |
| Gestational weight gain <sup>†</sup> (kg)                 | Con                | 9                        | 16.1 ± 3.8       |                      | 11                       | 16.6 ± 6.5       |                 |                          | 0.641             | 0.506            | 0.715        |
|                                                           | N3                 | 11                       | 14.9 ± 3.7       |                      | 10                       | 16.4 ± 3.5       |                 |                          |                   |                  |              |
| <b>Offspring characteristics</b>                          |                    |                          |                  |                      |                          |                  |                 |                          |                   |                  |              |
| Gestational age (d)                                       | Con                | 9                        | 279.4 ± 8.7      |                      | 11                       | 282.6 ± 4.8      |                 |                          | 0.811             | 0.649            | 0.309        |
|                                                           | N3                 | 11                       | 281.1 ± 5.4      |                      | 10                       | 279.9 ± 7.5      |                 |                          |                   |                  |              |
| Placental weight (g)                                      | Con                | 9                        | 551.0 ± 94.4     |                      | 11                       | 552.2 ± 70.0     |                 |                          | 0.469             | 0.859            | 0.896        |
|                                                           | N3                 | 11                       | 529.0 ± 99.9     |                      | 10                       | 536.9 ± 51.8     |                 |                          |                   |                  |              |
| Birth weight (g)                                          | Con                | 9                        | 3487.2 ± 280.8   |                      | 11                       | 3544.6 ± 298.0   |                 |                          | 0.993             | 0.922            | 0.577        |
|                                                           | N3                 | 11                       | 3536.8 ± 167.8   |                      | 10                       | 3496.5 ± 338.0   |                 |                          |                   |                  |              |
| Weight 1 year (g)                                         | Con                | 8                        | 9636.3 ± 1073.7  |                      | 11                       | 9058.2 ± 922.4   |                 |                          | 0.365             | 0.184            | 0.745        |
|                                                           | N3                 | 11                       | 9839.1 ± 1259.4  |                      | 10                       | 9486.0 ± 1020.7  |                 |                          |                   |                  |              |
| Birth weight percentile <sup>†</sup>                      | Con                | 9                        | 48.0 (29.5-54.0) |                      | 11                       | 54.0 (28.0-80.0) |                 |                          | 0.857             | 0.210            | 0.900        |
|                                                           | N3                 | 11                       | 41.0 (32.0-50.0) |                      | 10                       | 57.5 (32.8-82.3) |                 |                          |                   |                  |              |
| Birth height (cm)                                         | Con                | 9                        | 52.2 ± 1.6       |                      | 11                       | 51.4 ± 1.4       |                 |                          | 0.495             | 0.469            | 0.350        |
|                                                           | N3                 | 11                       | 52.1 ± 1.7       |                      | 10                       | 52.2 ± 1.8       |                 |                          |                   |                  |              |
| Birth head circumference (cm)                             | Con                | 9                        | 35.6 ± 1.1       |                      | 11                       | 35.0 ± 0.8       |                 |                          | 0.312             | 0.064            | 0.914        |
|                                                           | N3                 | 11                       | 35.3 ± 0.9       |                      | 10                       | 34.7 ± 1.1       |                 |                          |                   |                  |              |
| Birth weight / length (g/cm)                              | Con                | 9                        | 66.9 ± 6.2       |                      | 11                       | 69.0 ± 5.3       |                 |                          | 0.749             | 0.711            | 0.330        |
|                                                           | N3                 | 11                       | 67.9 ± 2.5       |                      | 10                       | 66.9 ± 5.6       |                 |                          |                   |                  |              |
| Birth weight / placenta weight <sup>†</sup>               | Con                | 9                        | 6.4 (6.0-6.9)    |                      | 11                       | 6.5 (5.9-6.9)    |                 |                          | 0.540             | 0.713            | 0.610        |
|                                                           | N3                 | 11                       | 6.9 (5.5-7.6)    |                      | 10                       | 6.6 (5.9-7.0)    |                 |                          |                   |                  |              |
| <b>LCPUFA biomarker</b>                                   |                    |                          |                  |                      |                          |                  |                 |                          |                   |                  |              |
| n6/n3 LCPUFA ratio <sup>2</sup><br>RBC mat. P_15          | Con                | 9                        | 2.64 (2.33-3.04) |                      | 11                       | 2.45 (2.26-3.13) |                 |                          | 0.276             | 0.301            | 0.136        |
|                                                           | N3                 | 11                       | 2.14 (1.84-2.67) |                      | 10                       | 2.74 (2.33-2.93) |                 |                          |                   |                  |              |
| n6/n3 LCPUFA ratio <sup>2</sup><br>RBC mat. P_32          | Con                | 9                        | 2.32 (1.91-2.69) |                      | 11                       | 2.86 (2.20-4.64) |                 |                          | <b>&lt; 0.001</b> | 0.160            | 0.650        |
|                                                           | N3                 | 11                       | 1.32 (1.07-1.99) |                      | 10                       | 1.46 (1.30-1.74) |                 | 0.195                    | 0.488             | <b>&lt;0.001</b> | <b>0.001</b> |
| n-6/n-3 LCPUFA ratio <sup>2</sup><br>CB RBCs <sup>†</sup> | Con                | 8                        | 4.90 (4.03-6.22) |                      | 9                        | 5.39 (4.07-7.39) |                 |                          | <b>0.005</b>      | 0.106            | 0.291        |
|                                                           | N3                 | 9                        | 2.62 (2.45-3.59) |                      | 8                        | 3.88 (3.18-5.16) |                 | 0.680                    | 0.062             | 0.172            | <b>0.007</b> |

Data are presented as n, mean ± SD or percentage for each of the four analysis groups (Con-M, Con-F, n3-M, n3-F). For quantitative variables the corresponding P values are calculated with two-way ANOVA (P\*, P#, P\*#). <sup>†</sup>Not normal distributed variables or variables that violated homoscedascity were presented as median (interquartile range IQR = 25<sup>th</sup>-75<sup>th</sup> percentile). Their corresponding P values were calculated with two-way ANOVA on ranks (P\*, P#, P\*#). In case of a significant two-way ANOVA P value, post-hoc tests (grey shaded) were conducted with Holm-Sidak test to adjust the significance level (Con-M vs. Con-F, n3-M vs. n3-F, n3-F vs. Con-F and n3-M vs. Con-M). <sup>‡</sup> For qualitative variables the Chi-Square test was used. P values < 0.05 were considered as significant and marked bold; P\* < 0.05 significant difference between the n-3 LCPUFA intervention and the control group, effect of the intervention, P# < 0.05 significant difference between male and female placentas, effect of offspring sex; P\*# < 0.05 significant interaction between sex and the intervention. <sup>1</sup>last measured value at booking minus self-reported weight before pregnancy, <sup>2</sup>n-6/n-3 LCPUFA ratio: (C20:2n-6 + C20:3n-6 + C20:4n-6 + C22:2n-6 + C22:4n-6 + C22:5n-6) / (C20:3n-3 + C20:4n-3 + C20:5n-3 + C22:3n-3 + C22:5n-3 + C22:6n-3); mat., maternal; CB, cord blood.

**Table S3: Oligonucleotides used for RT-qPCR analyses.**

| Gene name |            | Sequence (5'-3')                                           | Gene accession no. | Primer location on exon | Length (bp) | Temp (°C) |
|-----------|------------|------------------------------------------------------------|--------------------|-------------------------|-------------|-----------|
| hACTB     | for<br>rev | CCTGGAGAAGAGCTACGAGCTG<br>GACTCCATGCCAGGAAGGAAGG           | NM_001101.3        | 3 - 4                   | 108         | 60        |
| hPolR2a   | for<br>rev | CTTGTGTGATACCATGACCTGTCGTG<br>GCACGTCCACCGTTTCCTCAAAGG     | NM_000937.4        | 25 - 26                 | 115         | 60        |
| hB2M      | for<br>rev | GGAAGTGGTCTTTCTATCTCTTGTAC<br>TCTCGATCCCACTTAACTATCTTGG    | NM_004048.2        | 2 - 3                   | 120         | 60        |
| hTOP1     | for<br>rev | CTTCATCGACAAGCTTGCTCTG<br>TGATGTGCTCCACACGAAGTGA           | NM_003286.2        | 14 - 15                 | 98          | 60        |
| HDAC5     | for<br>rev | CCTACAGCAGAAGTTGAACGTGG<br>GAAGTTCCCGTTGTCATAGCGATG        | NM_000660.4        | 20 - 21                 | 139         | 60        |
| TGFB1     | for<br>rev | TGGTTGAGCCGTGGAGGGG<br>AACCCGTTGATGTCCACTTGCA              | NM_005474.4        | 3 - 4                   | 98          | 63        |
| DKK1      | for<br>rev | ACA ACT ACC AGC CGT ACC CGT<br>CTT CCT GCA GGC GAG ACA GAT | NM_012242.2        | 1 - 2                   | 116         | 60        |
| DVL1      | for<br>rev | CAGCAGAGTGAAGGGAGCAAA<br>TGTGATCCGATTCCTGCCACT             | NM_004421.2        | 14 - 15                 | 117         | 60        |
| LRP6      | for<br>rev | GGATCTCTTCCAGGAATGTCTCG<br>TGCAGGGAAGTAAGTGCCTTTGG         | NM_002336.2        | 20 - 21                 | 150         | 60        |
| LPL       | for<br>rev | AAACCCATACCAATCAGGCCTTTG<br>TTGTGGAAACTTCAGGCAGAGTGA       | NM_000237          | 7 - 8                   | 93          | 63        |
| CYP19A1   | for<br>rev | GAA GGT CCT GTG CTC GGG<br>CAG GCA CTG CCG ATC CC          | X55983             | 1.1 - 2                 | 296         | 60        |
| ANAPC4    |            | QT00027153                                                 | NM_013367          | 3 - 4                   | 70          | 55        |
| CDK1      |            | QT00042672                                                 | NM_001786          | 1- 3                    | 133         | 55        |
| CDK6      |            | †QT00019985                                                | NM_001259          | 5 - 7                   | 82          | 55        |
| MAD2L1    |            | QT00094955                                                 | NM_002358          | 1 - 2                   | 104         | 55        |
| PCNA      |            | †QT00024633                                                | NM_002592          | 5 - 6                   | 105         | 55        |
| FZD7      |            | QT01010919                                                 | NM_003507          | only 1 Exon             | 64          | 55        |
| SFRP1     |            | QT00031927                                                 | NM_003012          | 2 - 3                   | 91          | 55        |

for, forward primer; rev, reverse primer; † commercial primers were purchased from Qiagen (Hilden, Germany); § this gene consists only of one exon; Temp, annealing temperature.

**Table S4: Summary of genes with sex-specific expression identified independently by placental transcriptome analyses in control placentas of this study, and by Sood et al [15] and Tsai et al [37].**

| Gene symbol | Gene description                                                 | Location on Chr | Con-M vs. Con-F FC | Con-F P  |
|-------------|------------------------------------------------------------------|-----------------|--------------------|----------|
| CD99L2      | CD99 molecule-like 2                                             | X               | 1.92               | 0.0461   |
| EIF1AX      | eukaryotic translation initiation factor 1A, X-linked            | X               | -1.67              | 0.0447   |
| HDHD1A      | haloacid dehalogenase-like hydrolase domain containing 1A        | X               | -1.81              | 0.0013   |
| KDM6A       | lysine (K)-specific demethylase 6A                               | X               | -1.87              | 0.0071   |
| DDX3Y       | DEAD (Asp-Glu-Ala-Asp) box polypeptide 3, Y-linked               | Y               |                    |          |
| EIF1AY      | eukaryotic translation initiation factor 1A, Y-linked            | Y               |                    |          |
| KDM5D       | lysine (K)-specific demethylase 5D                               | Y               |                    |          |
| RPS4Y1      | ribosomal protein S4, Y-linked 1                                 | Y               |                    |          |
| USP9Y       | ubiquitin specific peptidase 9, Y-linked                         | Y               |                    |          |
| UTY         | ubiquitously transcribed tetratricopeptide repeat gene, Y-linked | Y               |                    |          |
| ZFY         | zinc finger protein, Y-linked                                    | Y               |                    |          |
| LPL         | lipoprotein lipase                                               | 8               | 5.60               | 2.4 E-05 |

Chr, chromosome; FC, fold change; Con-M, placentas of male offspring in the control group; Con-F, placentas of female offspring in the control group.

**Table S5: Placental gene expression of classical LCPUFA-regulated genes (literature selected), involved in lipid metabolism, analyzed in microarray data sets of this study.**

| Table S5a                                             |                                                                                   | N3-M+F<br>vs.<br>Con-M+F    |       | N3-M<br>vs.<br>Con-M |        | N3-F<br>vs.<br>Con-F |       |
|-------------------------------------------------------|-----------------------------------------------------------------------------------|-----------------------------|-------|----------------------|--------|----------------------|-------|
| Gene symbol                                           | Gene description                                                                  | FC                          | P     | FC                   | P      | FC                   | P     |
| <b>Gene group for fatty acid lipases</b>              |                                                                                   |                             |       |                      |        |                      |       |
| LPL                                                   | lipoprotein lipase                                                                | -1.61                       | >0.05 | -3.62                | >0.05  | 2.27                 | 0.038 |
| LIPE <sup>§</sup>                                     | lipase, hormone-sensitive                                                         | 1.06                        | >0.05 | -1.02                | >0.05  | 1.11                 | >0.05 |
| LIPC <sup>§</sup>                                     | lipase, hepatic                                                                   | -1.03                       | >0.05 | -1.03                | >0.05  | 1.00                 | >0.05 |
| PNLIP <sup>§</sup>                                    | pancreatic lipase                                                                 | 1.04                        | >0.05 | -1.10                | >0.05  | 1.09                 | >0.05 |
| <b>Gene group for long-chain fatty acid receptors</b> |                                                                                   |                             |       |                      |        |                      |       |
| GPR120 <sup>§</sup>                                   | omega-3 fatty acid receptor 1                                                     | -1.10                       | >0.05 | -1.02                | >0.05  | -1.04                | >0.05 |
| FFAR1 <sup>§</sup>                                    | free fatty acid receptor 1                                                        | 1.23                        | 0.030 | 1.16                 | 0.0452 | 1.07                 | >0.05 |
| <b>Gene group for fatty acid transport</b>            |                                                                                   |                             |       |                      |        |                      |       |
| CD36                                                  | CD36 molecule (thrombospondin receptor)                                           | 1.26                        | >0.05 | 1.55                 | >0.05  | -1.21                | >0.05 |
| FABP1 <sup>§</sup>                                    | fatty acid binding protein 1, liver                                               | 1.03                        | >0.05 | 1.05                 | >0.05  | -1.04                | >0.05 |
| FABP2 <sup>§</sup>                                    | fatty acid binding protein 2, intestinal                                          | 1.09                        | >0.05 | 1.02                 | >0.05  | 1.00                 | >0.05 |
| FABP3 <sup>§</sup>                                    | fatty acid binding protein 3, muscle and heart (mammary-derived growth inhibitor) | -1.07                       | >0.05 | 1.05                 | >0.05  | -1.09                | >0.05 |
| FABP4                                                 | fatty acid binding protein 4, adipocyte                                           | 1.42                        | >0.05 | 1.20                 | >0.05  | 1.20                 | >0.05 |
| FABP5                                                 | fatty acid binding protein 5 (psoriasis-associated)                               | not annotated               |       |                      |        |                      |       |
| FABP6 <sup>§</sup>                                    | fatty acid binding protein 6, ileal                                               | 1.07                        | >0.05 | -1.02                | >0.05  | -1.01                | >0.05 |
| FABP7 <sup>§</sup>                                    | fatty acid binding protein 7, brain                                               | 1.04                        | >0.05 | 1.00                 | >0.05  | 1.03                 | >0.05 |
| FABP9                                                 | fatty acid binding protein 9, testis                                              | no probe sets on microarray |       |                      |        |                      |       |
| GOT2 <sup>§</sup>                                     | glutamic-oxaloacetic transaminase 2, mitochondrial (aspartate aminotransferase 2) | -1.18                       | >0.05 | 1.15                 | >0.05  | -1.11                | >0.05 |
| SLC27A1 <sup>§</sup>                                  | solute carrier family 27 (fatty acid transporter), member 1                       | -1.03                       | >0.05 | -1.02                | >0.05  | 1.01                 | >0.05 |
| SLC27A2                                               | solute carrier family 27 (fatty acid transporter), member 2                       | -1.58                       | >0.05 | 1.05                 | >0.05  | -1.62                | >0.05 |
| SLC27A3                                               | solute carrier family 27 (fatty acid transporter), member 3                       | 1.06                        | >0.05 | 1.15                 | >0.05  | -1.04                | >0.05 |
| SLC27A4 <sup>§</sup>                                  | solute carrier family 27 (fatty acid transporter), member 4                       | 1.20                        | 0.047 | 1.12                 | >0.05  | 1.09                 | >0.05 |
| SLC27A5 <sup>§</sup>                                  | solute carrier family 27 (fatty acid transporter), member 5                       | -1.16                       | >0.05 | -1.04                | >0.05  | -1.10                | >0.05 |
| SLC27A6                                               | solute carrier family 27 (fatty acid transporter), member 6                       | -1.55                       | >0.05 | -1.24                | >0.05  | -1.25                | >0.05 |
| <b>Gene group for acyl CoA synthases</b>              |                                                                                   |                             |       |                      |        |                      |       |
| ACSL1                                                 | acyl-CoA synthetase long-chain family member 1                                    | -1.19                       | >0.05 | -1.08                | >0.05  | -1.18                | >0.05 |
| ACSL3                                                 | acyl-CoA synthetase long-chain family member 3                                    | no probe sets on microarray |       |                      |        |                      |       |
| ACSL4                                                 | acyl-CoA synthetase long-chain family member 4                                    | -1.48                       | >0.05 | -1.66                | >0.05  | 1.22                 | >0.05 |
| ACSL5 <sup>§</sup>                                    | acyl-CoA synthetase long-chain family member 5                                    | 1.03                        | >0.05 | -1.01                | >0.05  | 1.02                 | >0.05 |
| ACSL6                                                 | acyl-CoA synthetase long-chain family member 6                                    | no probe sets on microarray |       |                      |        |                      |       |
| <b>Gene group for acyl-CoA binding proteins (DBI)</b> |                                                                                   |                             |       |                      |        |                      |       |
| DBI                                                   | diazepam binding inhibitor (GABA receptor modulator, acyl-CoA binding protein)    | 1.04                        | >0.05 | 1.22                 | >0.05  | -1.13                | >0.05 |
| PECI                                                  | enoyl-CoA delta isomerase 2                                                       | -1.57                       | >0.05 | -1.09                | >0.05  | -1.50                | >0.05 |
| ACBP3-7                                               | acyl-CoA-binding protein 3-7                                                      | no probe sets on microarray |       |                      |        |                      |       |
| <b>Gene group for TG biosynthesis</b>                 |                                                                                   |                             |       |                      |        |                      |       |
| DGAT1 <sup>§</sup>                                    | diacylglycerol O-acyltransferase 1                                                | 1.15                        | >0.05 | 1.07                 | >0.05  | 1.10                 | >0.05 |
| DGAT2 <sup>§</sup>                                    | diacylglycerol O-acyltransferase 2                                                | 1.28                        | >0.05 | 1.11                 | >0.05  | 1.15                 | >0.05 |
| GPAM <sup>§</sup>                                     | glycerol-3-phosphate acyltransferase, mitochondrial                               | -1.15                       | >0.05 | 1.10                 | >0.05  | -1.19                | >0.05 |
| LPIN1                                                 | lipin 1                                                                           | -1.38                       | >0.05 | -1.64                | >0.05  | 1.24                 | >0.05 |
| LPIN2                                                 | lipin 2                                                                           | 1.10                        | >0.05 | 1.09                 | >0.05  | 1.06                 | >0.05 |
| MOGAT1 <sup>§</sup>                                   | monoacylglycerol O-acyltransferase 1                                              | 1.07                        | >0.05 | 1.18                 | 0.024  | -1.06                | >0.05 |
| MOGAT2 <sup>§</sup>                                   | monoacylglycerol O-acyltransferase 2                                              | 1.48                        | >0.05 | -1.03                | >0.05  | 1.45                 | 0.028 |



| <b>Table S5b</b>                                                              |                                                                                                                  | <b>N3-M+F<br/>vs.<br/>Con-M+F</b> |          | <b>N3-M<br/>vs.<br/>Con-M</b> |          | <b>N3-F<br/>vs.<br/>Con-F</b> |          |
|-------------------------------------------------------------------------------|------------------------------------------------------------------------------------------------------------------|-----------------------------------|----------|-------------------------------|----------|-------------------------------|----------|
| <b>Gene<br/>symbol</b>                                                        | <b>Gene description</b>                                                                                          | <b>FC</b>                         | <b>P</b> | <b>FC</b>                     | <b>P</b> | <b>FC</b>                     | <b>P</b> |
| <b>Gene group for <math>\beta</math>-oxidation</b>                            |                                                                                                                  |                                   |          |                               |          |                               |          |
| ACAA2 <sup>§</sup>                                                            | acetyl-CoA acyltransferase 2                                                                                     | 1.19                              | >0.05    | 1.15                          | 0.034    | 1.10                          | >0.05    |
| ACAA1 <sup>§</sup>                                                            | acetyl-CoA acyltransferase 1                                                                                     | -1.08                             | >0.05    | -1.10                         | >0.05    | -1.03                         | >0.05    |
| ACADM                                                                         | acyl-CoA dehydrogenase, C-4 to C-12 straight chain                                                               | -1.67                             | 0.024    | -1.22                         | >0.05    | -1.39                         | >0.05    |
| ACADS <sup>§</sup>                                                            | acyl-CoA dehydrogenase, C-2 to C-3 short chain                                                                   | 1.03                              | >0.05    | 1.01                          | >0.05    | 1.12                          | >0.05    |
| ACAD9                                                                         | acyl-CoA dehydrogenase family, member 9                                                                          | 1.01                              | >0.05    | -1.22                         | >0.05    | 1.30                          | >0.05    |
| ACAD11                                                                        | acyl-CoA dehydrogenase family, member 11                                                                         | -1.16                             | >0.05    | -1.26                         | >0.05    | 1.05                          | >0.05    |
| ACADVL                                                                        | acyl-CoA dehydrogenase, very long chain                                                                          | 1.30                              | >0.05    | -1.08                         | >0.05    | 1.35                          | >0.05    |
| ACOX1                                                                         | acyl-CoA oxidase 1, palmitoyl                                                                                    | -1.11                             | >0.05    | -1.00                         | >0.05    | -1.10                         | >0.05    |
| CPT1A                                                                         | carnitine palmitoyltransferase 1A (liver)                                                                        | -1.36                             | >0.05    | -1.05                         | >0.05    | -1.29                         | >0.05    |
| CPT1B                                                                         | carnitine palmitoyltransferase 1B (muscle)                                                                       | no probe sets on microarray       |          |                               |          |                               |          |
| CPT1C <sup>§</sup>                                                            | carnitine palmitoyltransferase 1C                                                                                | 1.00                              | >0.05    | 1.00                          | >0.05    | -1.01                         | >0.05    |
| CPT2                                                                          | carnitine palmitoyltransferase 2                                                                                 | -1.10                             | >0.05    | 1.01                          | >0.05    | -1.13                         | >0.05    |
| ECH1                                                                          | enoyl CoA hydratase 1, peroxisomal                                                                               | -1.12                             | >0.05    | -1.05                         | >0.05    | -1.07                         | >0.05    |
| ECHS1                                                                         | enoyl CoA hydratase, short chain, 1, mitochondrial                                                               | -1.16                             | >0.05    | 1.16                          | >0.05    | -1.28                         | 0.022    |
| HADHA                                                                         | hydroxyacyl-CoA dehydrogenase/3-ketoacyl-CoA thiolase/enoyl-CoA hydratase (trifunctional protein), alpha subunit | -1.01                             | >0.05    | -1.08                         | >0.05    | 1.10                          | >0.05    |
| HADHB                                                                         | hydroxyacyl-CoA dehydrogenase/3-ketoacyl-CoA thiolase/enoyl-CoA hydratase (trifunctional protein), beta subunit  | 1.01                              | >0.05    | 1.06                          | >0.05    | -1.05                         | >0.05    |
| NDUFAB1                                                                       | NADH dehydrogenase (ubiquinone) 1, alpha/beta subcomplex, 1, 8kDa                                                | -1.05                             | >0.05    | 1.03                          | >0.05    | 1.00                          | >0.05    |
| SLC25A20 <sup>§</sup>                                                         | solute carrier family 25 (carnitine/acylcarnitine translocase), member 20                                        | 1.14                              | >0.05    | 1.05                          | >0.05    | -1.07                         | >0.05    |
| <b>Gene group for <math>\beta</math> oxidation of uneven fatty acids</b>      |                                                                                                                  |                                   |          |                               |          |                               |          |
| PCCA                                                                          | propionyl CoA carboxylase, alpha polypeptide                                                                     | -1.02                             | >0.05    | -1.08                         | >0.05    | 1.04                          | >0.05    |
| PCCB                                                                          | propionyl CoA carboxylase, beta polypeptide                                                                      | 1.04                              | >0.05    | -1.02                         | >0.05    | 1.00                          | >0.05    |
| MCEE                                                                          | methylmalonyl CoA epimerase                                                                                      | 1.05                              | >0.05    | 1.11                          | >0.05    | -1.14                         | >0.05    |
| <b>Gene group for <math>\beta</math> oxidation in unsaturated fatty acids</b> |                                                                                                                  |                                   |          |                               |          |                               |          |
| EHHADH <sup>§</sup>                                                           | enoyl-CoA, hydratase/3-hydroxyacyl CoA dehydrogenase                                                             | 1.10                              | >0.05    | 1.12                          | >0.05    | 1.06                          | >0.05    |
| ACADL <sup>§</sup>                                                            | acyl-CoA dehydrogenase, long chain                                                                               | 1.00                              | >0.05    | -1.15                         | >0.05    | 1.04                          | >0.05    |
| <b>Gene group for biosynthesis of saturated fatty acids</b>                   |                                                                                                                  |                                   |          |                               |          |                               |          |
| ACACA                                                                         | acetyl-CoA carboxylase alpha                                                                                     | 1.20                              | >0.05    | 1.07                          | >0.05    | 1.18                          | >0.05    |
| ACACB <sup>§</sup>                                                            | acetyl-CoA carboxylase beta                                                                                      | 1.12                              | >0.05    | 1.04                          | >0.05    | 1.07                          | >0.05    |
| FASN <sup>§</sup>                                                             | fatty acid synthase                                                                                              | 1.29                              | >0.05    | -1.18                         | >0.05    | 1.49                          | .0003    |
| <b>Gene group for biosynthesis of unsaturated fatty acids</b>                 |                                                                                                                  |                                   |          |                               |          |                               |          |
| FADS6 <sup>§</sup>                                                            | fatty acid desaturase domain family, member 6                                                                    | -1.05                             | >0.05    | -1.03                         | >0.05    | -1.01                         | >0.05    |
| FADS2 <sup>§</sup>                                                            | fatty acid desaturase 2                                                                                          | -1.06                             | >0.05    | 1.12                          | >0.05    | -1.12                         | >0.05    |
| ELOVL1                                                                        | ELOVL fatty acid elongase 1                                                                                      | 1.00                              | >0.05    | 1.04                          | >0.05    | -1.03                         | >0.05    |
| ELOVL2 <sup>§</sup>                                                           | ELOVL fatty acid elongase 2                                                                                      | -1.14                             | >0.05    | 1.03                          | >0.05    | -1.22                         | >0.05    |
| ELOVL3 <sup>§</sup>                                                           | ELOVL fatty acid elongase 3                                                                                      | 1.03                              | >0.05    | -1.05                         | >0.05    | 1.06                          | >0.05    |
| ELOVL4 <sup>§</sup>                                                           | ELOVL fatty acid elongase 4                                                                                      | -1.04                             | >0.05    | -1.03                         | >0.05    | -1.17                         | >0.05    |
| ELOVL5                                                                        | ELOVL fatty acid elongase 5                                                                                      | -1.23                             | >0.05    | -1.11                         | >0.05    | 1.01                          | >0.05    |
| ELOVL6 <sup>§</sup>                                                           | ELOVL fatty acid elongase 6                                                                                      | 1.01                              | >0.05    | -1.01                         | >0.05    | -1.03                         | >0.05    |
| ELOVL7 <sup>§</sup>                                                           | ELOVL fatty acid elongase 7                                                                                      | -1.30                             | >0.05    | -1.42                         | >0.05    | 1.04                          | >0.05    |
| SCD1                                                                          | stearoyl-CoA desaturase (delta-9-desaturase)                                                                     | 1.02                              | >0.05    | -1.21                         | >0.05    | 1.14                          | >0.05    |
| <b>Gene group for biosynthesis of eicosanoids</b>                             |                                                                                                                  |                                   |          |                               |          |                               |          |
| PLA2G4A <sup>§</sup>                                                          | phospholipase A2, group IVA (cytosolic, calcium-dependent)                                                       | -1.35                             | >0.05    | -1.24                         | >0.05    | -1.03                         | >0.05    |
| PLA2G4D <sup>§</sup>                                                          | phospholipase A2, group IVD (cytosolic)                                                                          | -1.18                             | >0.05    | -1.14                         | >0.05    | 1.00                          | >0.05    |
| PLA2G4E                                                                       | phospholipase A2, group IVE                                                                                      | not annotated                     |          |                               |          |                               |          |
| PLA2G4F <sup>§</sup>                                                          | phospholipase A2, group IVF                                                                                      | 1.04                              | >0.05    | 1.10                          | >0.05    | 1.02                          | >0.05    |

| Table S5c                                                      |                                                                                               | N3-M+F<br>vs.<br>Con-M+F    |       | N3-F<br>vs.<br>Con-F |       | N3-M<br>vs.<br>Con-M |       |
|----------------------------------------------------------------|-----------------------------------------------------------------------------------------------|-----------------------------|-------|----------------------|-------|----------------------|-------|
| Gene<br>symbol                                                 | Gene description                                                                              | FC                          | P     | FC                   | P     | FC                   | P     |
| <b>Gene group for biosynthesis of eicosanoids continued</b>    |                                                                                               |                             |       |                      |       |                      |       |
| PTGS1§                                                         | prostaglandin-endoperoxide synthase 1 (prostaglandin G/H synthase and cyclooxygenase)         | 1.03                        | >0.05 | 1.16                 | >0.05 | -1.01                | >0.05 |
| PTGS2§                                                         | prostaglandin-endoperoxide synthase 2 (prostaglandin G/H synthase and cyclooxygenase)         | 1.37                        | >0.05 | -1.16                | >0.05 | 1.47                 | >0.05 |
| ALOX12§                                                        | arachidonate 12-lipoxygenase                                                                  | 1.01                        | >0.05 | 1.01                 | >0.05 | 1.03                 | >0.05 |
| ALOX12B§                                                       | arachidonate 12-lipoxygenase, 12R type                                                        | -1.05                       | >0.05 | 1.05                 | >0.05 | -1.06                | >0.05 |
| ALOX15§                                                        | arachidonate 15-lipoxygenase                                                                  | -1.03                       | >0.05 | -1.02                | >0.05 | -1.03                | >0.05 |
| ALOX15B§                                                       | arachidonate 15-lipoxygenase, type B                                                          | 1.07                        | >0.05 | 1.05                 | >0.05 | 1.02                 | >0.05 |
| ALOX5                                                          | arachidonate 5-lipoxygenase                                                                   | -1.00                       | >0.05 | 1.02                 | >0.05 | -1.03                | >0.05 |
| ALOX5AP                                                        | arachidonate 5-lipoxygenase-activating protein                                                | -1.31                       | >0.05 | -1.24                | >0.05 | -1.02                | >0.05 |
| ALOXE3§                                                        | arachidonate lipoxygenase 3                                                                   | 1.16                        | >0.05 | -1.08                | >0.05 | 1.12                 | >0.05 |
| <b>Gene group for storage and release of PUFA in TG and PL</b> |                                                                                               |                             |       |                      |       |                      |       |
| AGPAT1                                                         | 1-acylglycerol-3-phosphate O-acyltransferase 1 (lysophosphatidic acid acyltransferase, alpha) | 1.03                        | >0.05 | 1.05                 | >0.05 | -1.08                | >0.05 |
| PPAP2A                                                         | phosphatidic acid phosphatase type 2A                                                         | -1.39                       | >0.05 | -1.03                | >0.05 | -1.39                | >0.05 |
| PPAP2B                                                         | phosphatidic acid phosphatase type 2B                                                         | 1.13                        | >0.05 | 1.09                 | >0.05 | 1.04                 | >0.05 |
| PPAP2C§                                                        | phosphatidic acid phosphatase type 2C                                                         | 1.06                        | >0.05 | 1.03                 | >0.05 | 1.08                 | >0.05 |
| ACAT1                                                          | acetyl-CoA acetyltransferase 1                                                                | -1.10                       | >0.05 | -1.10                | >0.05 | -1.04                | >0.05 |
| CAV1                                                           | caveolin 1, caveolae protein, 22kDa                                                           | -1.08                       | >0.05 | 1.05                 | >0.05 | -1.17                | >0.05 |
| PLIN2                                                          | perilipin 2                                                                                   | 1.76                        | >0.05 | -1.08                | >0.05 | 1.97                 | >0.05 |
| PPARA§                                                         | peroxisome proliferator-activated receptor alpha                                              | -1.00                       | >0.05 | 1.04                 | >0.05 | -1.02                | >0.05 |
| PPARG                                                          | peroxisome proliferator-activated receptor gamma                                              | -1.27                       | >0.05 | 1.03                 | >0.05 | -1.21                | >0.05 |
| PPARGC1§A                                                      | peroxisome proliferator-activated receptor gamma, coactivator 1 alpha                         | 1.25                        | 0.046 | 1.06                 | >0.05 | 1.17                 | >0.05 |
| RXRA                                                           | retinoid X receptor, alpha                                                                    | -1.02                       | >0.05 | -1.20                | 0.015 | 1.21                 | 0.007 |
| RXRB                                                           | retinoid X receptor, beta                                                                     | 1.11                        | >0.05 | -1.08                | >0.05 | 1.12                 | >0.05 |
| RXRG§                                                          | retinoid X receptor, gamma                                                                    | 1.04                        | >0.05 | -1.02                | >0.05 | 1.04                 | >0.05 |
| HNF4A                                                          | hepatocyte nuclear factor 4, alpha                                                            | not annotated               |       |                      |       |                      |       |
| HNF4B                                                          | hepatocyte nuclear factor 4, beta                                                             | no probe sets on microarray |       |                      |       |                      |       |
| HNF4G§                                                         | hepatocyte nuclear factor 4, gamma                                                            | 1.18                        | >0.05 | 1.01                 | >0.05 | 1.13                 | >0.05 |
| NR1H3                                                          | nuclear receptor subfamily 1, group H, member 3                                               | 1.04                        | >0.05 | 1.04                 | >0.05 | 1.04                 | >0.05 |
| SREBF1§                                                        | sterol regulatory element binding transcription factor 1                                      | 1.32                        | >0.05 | -1.23                | >0.05 | 1.57                 | >0.05 |
| SREBF2                                                         | sterol regulatory element binding transcription factor 2                                      | no probe sets on microarray |       |                      |       |                      |       |
| NFKB1                                                          | nuclear factor of kappa light polypeptide gene enhancer in B-cells 1                          | 1.03                        | >0.05 | 1.02                 | >0.05 | -1.03                | >0.05 |

§ average intensity below 20; Con-M, placentas of male offspring in the control group; Con-F, placentas of female offspring in the control group; n3-M, placentas of male offspring in the n-3 LCPUFA intervention group; n3-F, placentas of female offspring in the n-3 LCPUFA intervention group; FC, fold change; P, P-value.

**Table S6: Expression changes of known PPAR  $\beta$  /  $\delta$  target genes (literature-selected) analyzed in microarray data sets of this study.**

| Table S6a             |                                                                           | N3-M+F<br>vs.<br>Con-M+F    |        | N3-M<br>vs.<br>Con-M |        | N3-F<br>vs.<br>Con-F |        |
|-----------------------|---------------------------------------------------------------------------|-----------------------------|--------|----------------------|--------|----------------------|--------|
| Gene symbol           | Gene description                                                          | FC                          | P      | FC                   | P      | FC                   | P      |
| ABCA1                 | ATP-binding cassette, sub-family A (ABC1), member 1                       | -1.02                       | >0.05  | 1.02                 | >0.05  | -1.09                | >0.05  |
| ACAA2 <sup>§</sup>    | acetyl-CoA acyltransferase 2                                              | 1.19                        | >0.05  | 1.15                 | 0.0343 | 1.10                 | >0.05  |
| ACSL5 <sup>§</sup>    | acyl-CoA synthetase long-chain family member 5                            | 1.03                        | >0.05  | -1.01                | >0.05  | 1.02                 | >0.05  |
| PLIN2                 | perilipin 2                                                               | 1.76                        | >0.05  | -1.08                | >0.05  | 1.97                 | >0.05  |
| AHNAK                 | AHNAK nucleoprotein                                                       | -1.06                       | >0.05  | -1.10                | >0.05  | -1.00                | >0.05  |
| AK3                   | adenylate kinase 3                                                        | -1.05                       | >0.05  | -1.00                | >0.05  | -1.08                | >0.05  |
| ANGPTL4               | angiopoietin-like 4                                                       | 1.15                        | >0.05  | -1.13                | >0.05  | 1.37                 | >0.05  |
| AP2A1 <sup>§</sup>    | adaptor-related protein complex 2, alpha 1 subunit                        | 1.08                        | >0.05  | -1.07                | >0.05  | 1.15                 | >0.05  |
| APH1B <sup>§</sup>    | anterior pharynx defective 1 homolog B (C. elegans)                       | 1.01                        | >0.05  | -1.02                | >0.05  | -1.04                | >0.05  |
| BIRC3                 | baculoviral IAP repeat containing 3                                       | no probe sets on microarray |        |                      |        |                      |        |
| CDKN2C <sup>§</sup>   | cyclin-dependent kinase inhibitor 2C (p18, inhibits CDK4)                 | -1.01                       | >0.05  | 1.09                 | >0.05  | -1.06                | >0.05  |
| CNO                   | biogenesis of lysosomal organelles complex-1, subunit 4, cappuccino       | 1.30                        | >0.05  | -1.07                | >0.05  | 1.40                 | 0.0068 |
| CPT1a                 | carnitine palmitoyltransferase 1A (liver)                                 | -1.36                       | >0.05  | -1.05                | >0.05  | -1.29                | >0.05  |
| CPT2                  | carnitine palmitoyltransferase 2                                          | -1.10                       | >0.05  | 1.01                 | >0.05  | -1.13                | >0.05  |
| CSNK1G2 <sup>§</sup>  | casein kinase 1, gamma 2                                                  | -1.07                       | >0.05  | -1.06                | >0.05  | 1.00                 | >0.05  |
| CTBS <sup>§</sup>     | chitinase, di-N-acetyl-                                                   | -1.13                       | >0.05  | 1.09                 | >0.05  | -1.25                | >0.05  |
| CYB5D2 <sup>§</sup>   | cytochrome b5 domain containing 2                                         | 1.08                        | >0.05  | 1.07                 | >0.05  | -1.03                | >0.05  |
| DCP1A                 | DCP1 decapping enzyme homolog A (S. cerevisiae)                           | -1.15                       | >0.05  | -1.35                | >0.05  | 1.20                 | 0.0120 |
| DIAPH1                | diaphanous homolog 1 (Drosophila)                                         | 1.41                        | >0.05  | -1.15                | >0.05  | 1.48                 | 0.0135 |
| DOCK4                 | dedicator of cytokinesis 4                                                | -1.65                       | >0.05  | 1.02                 | >0.05  | -1.68                | >0.05  |
| ECH1                  | enoyl CoA hydratase 1, peroxisomal                                        | -1.12                       | >0.05  | -1.05                | >0.05  | -1.07                | >0.05  |
| ETFB                  | electron-transfer-flavoprotein, beta polypeptide                          | -1.10                       | >0.05  | 1.15                 | >0.05  | -1.23                | >0.05  |
| ETFDH <sup>§</sup>    | electron-transferring-flavoprotein dehydrogenase                          | 1.07                        | >0.05  | -1.02                | >0.05  | 1.16                 | >0.05  |
| EXOC6B <sup>§</sup>   | exocyst complex component 6B                                              | 1.06                        | >0.05  | -1.04                | >0.05  | 1.08                 | >0.05  |
| GPR180 <sup>§</sup>   | G protein-coupled receptor 180                                            | -1.27                       | >0.05  | -1.06                | >0.05  | -1.27                | >0.05  |
| GRAMD3                | GRAM domain containing 3                                                  | 1.30                        | >0.05  | 1.05                 | >0.05  | 1.26                 | >0.05  |
| HMOX1                 | heme oxygenase (decycling) 1                                              | -1.44                       | >0.05  | -1.30                | >0.05  | -1.15                | >0.05  |
| HSD11B2               | hydroxysteroid (11-beta) dehydrogenase 2                                  | 1.66                        | >0.05  | 1.24                 | >0.05  | 1.35                 | >0.05  |
| HSDL2                 | hydroxysteroid dehydrogenase like 2                                       | -1.77                       | >0.05  | -1.25                | >0.05  | -1.54                | >0.05  |
| IFIT2                 | interferon-induced protein with tetratricopeptide repeats 2               | -1.16                       | >0.05  | -1.05                | >0.05  | -1.06                | >0.05  |
| IMPA2                 | inositol(myo)-1(or 4)-monophosphatase 2                                   | 1.49                        | >0.05  | 1.11                 | >0.05  | 1.32                 | >0.05  |
| ISCA1                 | iron-sulfur cluster assembly 1 homolog (S.                                | -1.55                       | >0.05  | -1.10                | >0.05  | -1.41                | 0.0356 |
| KLF10                 | Kruppel-like factor 10                                                    | -1.07                       | >0.05  | 1.17                 | >0.05  | -1.22                | 0.0045 |
| KLF11                 | Kruppel-like factor 11                                                    | -1.69                       | 0.0398 | -1.15                | >0.05  | -1.54                | 0.0144 |
| MLYCD <sup>§</sup>    | malonyl-CoA decarboxylase                                                 | 1.11                        | >0.05  | 1.17                 | >0.05  | -1.05                | >0.05  |
| MYO18A                | myosin XVIII A                                                            | not annotated               |        |                      |        |                      |        |
| NUDT13 <sup>§</sup>   | nudix (nucleoside diphosphate linked moiety X)-type motif 13              | -1.01                       | >0.05  | -1.02                | >0.05  | 1.04                 | >0.05  |
| NUDT9                 | nudix (nucleoside diphosphate linked moiety X)-type motif 9               | -1.04                       | >0.05  | -1.11                | >0.05  | 1.07                 | >0.05  |
| PDK4                  | pyruvate dehydrogenase kinase, isozyme 4                                  | -1.25                       | >0.05  | 1.02                 | >0.05  | -1.25                | >0.05  |
| PLIN1 <sup>§</sup>    | perilipin 1                                                               | 1.09                        | >0.05  | -1.01                | >0.05  | 1.03                 | >0.05  |
| PPARG                 | peroxisome proliferator-activated receptor gamma                          | -1.27                       | >0.05  | 1.03                 | >0.05  | -1.21                | >0.05  |
| RUNX1 <sup>§</sup>    | runt-related transcription factor 1                                       | 1.01                        | >0.05  | -1.07                | >0.05  | 1.11                 | >0.05  |
| SLC25A20 <sup>§</sup> | solute carrier family 25 (carnitine/acylcarnitine translocase), member 20 | 1.14                        | >0.05  | 1.05                 | >0.05  | -1.07                | >0.05  |
| SYTL3 <sup>§</sup>    | synaptotagmin-like 3                                                      | 1.02                        | >0.05  | 1.06                 | >0.05  | 1.04                 | >0.05  |

| <b>Table S6b</b>       |                                                       | <b>N3-M+ F<br/>vs.<br/>Con-M+F</b> |          | <b>N3-M<br/>vs.<br/>Con-M</b> |          | <b>N3-F<br/>vs.<br/>Con-F</b> |          |
|------------------------|-------------------------------------------------------|------------------------------------|----------|-------------------------------|----------|-------------------------------|----------|
| <b>Gene<br/>symbol</b> | <b>Gene description</b>                               | <b>FC</b>                          | <b>P</b> | <b>FC</b>                     | <b>P</b> | <b>FC</b>                     | <b>P</b> |
| TALDO1                 | transaldolase 1                                       | 1.05                               | >0.05    | 1.03                          | >0.05    | -1.04                         | >0.05    |
| TIMP4                  | TIMP metalloproteinase inhibitor 4                    | no probe sets on microarray        |          |                               |          |                               |          |
| TMEM135                | transmembrane protein 135                             | no probe sets on microarray        |          |                               |          |                               |          |
| TNFRSF1A               | tumor necrosis factor receptor superfamily, member 1A | -1.09                              | >0.05    | -1.03                         | >0.05    | -1.05                         | >0.05    |
| TTC33                  | tetratricopeptide repeat domain 33                    | 1.01                               | >0.05    | 1.02                          | >0.05    | 1.01                          | >0.05    |
| UROS <sup>§</sup>      | uroporphyrinogen III synthase                         | 1.06                               | >0.05    | 1.01                          | >0.05    | -1.05                         | >0.05    |
| VAMP8                  | vesicle-associated membrane protein 8                 | 1.13                               | >0.05    | 1.08                          | >0.05    | 1.02                          | >0.05    |
| ZNF354A                | zinc finger protein 354A                              | 1.01                               | >0.05    | -1.09                         | >0.05    | 1.04                          | >0.05    |
| ZNF367 <sup>§</sup>    | zinc finger protein 367                               | -1.02                              | >0.05    | 1.24                          | 0.0107   | -1.26                         | 0.0262   |

§ average intensity below 20; Con-M, placentas of male offspring in the control group; Con-F, placentas of female offspring in the control group; N3-M, placentas of male offspring in the n-3 LCPUFA intervention group; N3-F, placentas of female offspring in the n-3 LCPUFA intervention group; FC, fold change; P, P-value.

**Table S7: Expression changes of known as PPAR $\gamma$  target genes (literature-selected) analyzed in microarray data sets in this study.**

| Gene symbol          | Gene description                                                                              | N3-M+F vs. Con-M+F          |        | N3-M vs. Con-M |        | N3-F vs. Con-F |        |
|----------------------|-----------------------------------------------------------------------------------------------|-----------------------------|--------|----------------|--------|----------------|--------|
|                      |                                                                                               | FC                          | P      | FC             | P      | FC             | P      |
| ADIPOQ <sup>§</sup>  | adiponectin, C1Q and collagen domain containing                                               | -1.07                       | <0.05  | -1.09          | <0.05  | 1.04           | <0.05  |
| ANGPTL4              | angiopoietin-like 4                                                                           | 1.15                        | <0.05  | -1.13          | <0.05  | 1.37           | <0.05  |
| APOE                 | apolipoprotein E                                                                              | 1.45                        | <0.05  | -1.02          | <0.05  | 1.30           | <0.05  |
| AQP7 <sup>§</sup>    | aquaporin 7                                                                                   | 1.03                        | <0.05  | 1.08           | <0.05  | -1.02          | <0.05  |
| BCMO1 <sup>§</sup>   | beta-carotene 15,15'-monooxygenase 1                                                          | 1.09                        | <0.05  | 1.11           | <0.05  | -1.01          | <0.05  |
| CAT                  | catalase                                                                                      | -1.39                       | <0.05  | 1.02           | <0.05  | -1.34          | <0.05  |
| CD36                 | CD36 molecule (thrombospondin receptor)                                                       | 1.26                        | <0.05  | 1.55           | <0.05  | -1.21          | <0.05  |
| CIDEA <sup>§</sup>   | cell death-inducing DFFA-like effector a                                                      | -1.07                       | <0.05  | -1.01          | <0.05  | -1.06          | <0.05  |
| CPT1A                | carnitine palmitoyltransferase 1A (liver)                                                     | -1.36                       | <0.05  | -1.05          | <0.05  | -1.29          | <0.05  |
| DBI                  | diazepam binding inhibitor (GABA receptor modulator, acyl-CoA binding protein)                | 1.04                        | <0.05  | 1.22           | <0.05  | -1.13          | <0.05  |
| FABP4                | fatty acid binding protein 4, adipocyte                                                       | 1.42                        | <0.05  | 1.20           | <0.05  | 1.20           | <0.05  |
| G0S2                 | G0/G1switch 2                                                                                 | 1.18                        | <0.05  | 1.28           | <0.05  | -1.05          | <0.05  |
| GCK <sup>§</sup>     | glucokinase (hexokinase 4)                                                                    | 1.06                        | <0.05  | -1.01          | <0.05  | 1.09           | <0.05  |
| IGFBP1*              | insulin-like growth factor binding protein 1                                                  | 1.60                        | <0.05  | 10.8           | 0.0433 | -7.30          | <0.05  |
| IGFBP2               | insulin-like growth factor binding protein 2, 36kDa                                           | -1.38                       | <0.05  | 1.33           | <0.05  | -1.69          | <0.05  |
| IGFBP5               | insulin-like growth factor binding protein 5                                                  | -1.18                       | <0.05  | -1.25          | <0.05  | -1.01          | <0.05  |
| INSIG1               | insulin induced gene 1                                                                        | 1.18                        | <0.05  | -1.65          | <0.05  | 2.00           | <0.05  |
| LPL*                 | lipoprotein lipase                                                                            | -1.61                       | <0.05  | -3.62          | <0.05  | 2.27           | 0.0380 |
| LRP1                 | low density lipoprotein receptor-related protein 1                                            | -1.18                       | <0.05  | -1.03          | <0.05  | -1.09          | <0.05  |
| MC2R <sup>§</sup>    | melanocortin 2 receptor (adrenocorticotrophic hormone)                                        | 1.02                        | <0.05  | 1.03           | <0.05  | 1.02           | <0.05  |
| MUC1                 | mucin 1, cell surface associated                                                              | 1.20                        | <0.05  | -1.34          | <0.05  | 1.47           | 0.0460 |
| NPHS1                | nephrosis 1, congenital, Finnish type (nephrin)                                               | no probe sets on microarray |        |                |        |                |        |
| NR1D1 <sup>§</sup>   | nuclear receptor subfamily 1, group D, member 1                                               | 1.19                        | <0.05  | 1.13           | <0.05  | 1.09           | <0.05  |
| NR1H3                | nuclear receptor subfamily 1, group H, member 3                                               | 1.04                        | <0.05  | 1.04           | <0.05  | 1.04           | <0.05  |
| PCK1 <sup>§</sup>    | phosphoenolpyruvate carboxykinase 1 (soluble)                                                 | -1.06                       | <0.05  | -1.18          | <0.05  | 1.22           | 0.0293 |
| PLIN1 <sup>§</sup>   | perilipin 1                                                                                   | 1.09                        | <0.05  | -1.01          | <0.05  | 1.03           | <0.05  |
| PLIN2                | perilipin 2                                                                                   | 1.76                        | <0.05  | -1.08          | <0.05  | 1.97           | <0.05  |
| PTGS2                | prostaglandin-endoperoxide synthase 2 (prostaglandin G/H synthase and cyclooxygenase)         | 1.37                        | <0.05  | -1.16          | <0.05  | 1.47           | <0.05  |
| SCARB1               | scavenger receptor class B, member 1                                                          | 1.01                        | <0.05  | -1.29          | 0.0426 | 1.36           | <0.05  |
| SCNN1G <sup>§</sup>  | sodium channel, non-voltage-gated 1, gamma subunit                                            | 1.10                        | <0.05  | -1.01          | <0.05  | 1.11           | <0.05  |
| SERPINE1             | serpin peptidase inhibitor, clade E (nexin, plasminogen activator inhibitor type 1), member 1 | -1.02                       | <0.05  | 1.14           | <0.05  | -1.17          | <0.05  |
| SLC1A2 <sup>§</sup>  | solute carrier family 1 (glial high affinity glutamate transporter), member 2                 | -1.09                       | <0.05  | 1.05           | <0.05  | -1.04          | <0.05  |
| SLC22A1 <sup>§</sup> | solute carrier family 22 (organic cation transporter), member 1                               | -1.02                       | <0.05  | 1.01           | <0.05  | -1.06          | <0.05  |
| SLC27A1 <sup>§</sup> | solute carrier family 27 (fatty acid transporter), member 1                                   | -1.03                       | <0.05  | -1.02          | <0.05  | 1.01           | <0.05  |
| SLC27A4 <sup>§</sup> | solute carrier family 27 (fatty acid transporter), member 4                                   | 1.20                        | 0.0474 | 1.12           | <0.05  | 1.09           | <0.05  |
| SLC2A2               | solute carrier family 2 (facilitated glucose transporter), member 2                           | no probe sets on microarray |        |                |        |                |        |
| SORBS1 <sup>§</sup>  | sorbin and SH3 domain containing 1                                                            | 1.08                        | <0.05  | 1.02           | <0.05  | 1.15           | <0.05  |
| TFF2 <sup>§</sup>    | trefol factor 2                                                                               | 1.03                        | <0.05  | -1.05          | <0.05  | 1.16           | 0.0193 |
| UCP1 <sup>§</sup>    | uncoupling protein 1 (mitochondrial, proton carrier)                                          | 1.11                        | <0.05  | 1.14           | <0.05  | -1.01          | <0.05  |

§ average hybridization intensity below 20; \* genes with significantly differential expressed genes; Con-M, placentas of male offspring in the control group; Con-F, placentas of female offspring in the control group; N3-M, placentas of male offspring in the n-3 LCPUFA intervention group; N3-F, placentas of female offspring in the N-3 LCPUFA intervention group; FC, fold change; P, P-value.

**Table S8: Sex steroid hormone analysis in placental tissue and cord plasma.**

| Sex steroid hormones                                                  |     | Male |        |                                                 | Female |        |                                                 | Con-M vs. Con-F | P*           | P#           | P*#          |
|-----------------------------------------------------------------------|-----|------|--------|-------------------------------------------------|--------|--------|-------------------------------------------------|-----------------|--------------|--------------|--------------|
|                                                                       |     | n    | median | (25 <sup>th</sup> -75 <sup>th</sup> percentile) | n      | median | (25 <sup>th</sup> -75 <sup>th</sup> percentile) |                 |              |              |              |
| CP free estradiol-17 $\beta$ ng/ml <sup>†</sup>                       | Con | 7    | 13.4   | (11.4-38.0)                                     | 8      | 17.2   | (13.1-32.0)                                     |                 | 0.319        | 0.709        | 0.367        |
|                                                                       | N3  | 9    | 20.9   | (18.7-24.3)                                     | 9      | 18.5   | (11.7-26.0)                                     |                 |              |              |              |
| CP conjugated estradiol-17 $\beta$ ng/ml <sup>†</sup>                 | Con | 7    | 272.5  | (219.0-318.0)                                   | 8      | 247.8  | (174.6-380.0)                                   |                 | 0.188        | 0.778        | 0.190        |
|                                                                       | N3  | 9    | 158.0  | (141.0-270.8)                                   | 9      | 281.5  | (170.0-324.3)                                   |                 |              |              |              |
| CP total free estrogene ng/ml                                         | Con | 7    | 26.9   | (24.1-57.0)                                     | 8      | 42.6   | (31.7-69.7)                                     |                 | 0.290        | 0.495        | 0.210        |
|                                                                       | N3  | 9    | 43.1   | (36.7-65.4)                                     | 9      | 49.1   | (26.1-63.9)                                     |                 |              |              |              |
| CP conjugated total estrogene ng/ml <sup>†</sup>                      | Con | 7    | 132.8  | (110.4-298.9)                                   | 8      | 111.0  | (74.2-192.6)                                    |                 | 0.083        | 0.847        | 0.094        |
|                                                                       | N3  | 9    | 79.3   | (63.4-106.6)                                    | 9      | 120.0  | (76.2-148.5)                                    |                 |              |              |              |
| CP testosterone ng/ml <sup>†</sup>                                    | Con | 7    | 1.3    | (1.0-1.3)                                       | 8      | 1.1    | (0.8-1.3)                                       |                 | 0.519        | <b>0.049</b> | 0.762        |
|                                                                       | N3  | 9    | 1.2    | (1.0-1.4)                                       | 9      | 0.9    | (0.8-1.1)                                       | 0.246           | 0.090        | 0.496        | 0.811        |
| CP progesterone ng/ml <sup>†</sup>                                    | Con | 7    | 435.0  | (358.0-803.0)                                   | 8      | 713.5  | (367.0-857.5)                                   |                 | 0.222        | 0.965        | 0.232        |
|                                                                       | N3  | 9    | 717.0  | (481.0-1154.5)                                  | 9      | 629.0  | (439.0-799.0)                                   |                 |              |              |              |
| CP free estradiol-17 $\beta$ / testosterone ratio <sup>†</sup>        | Con | 7    | 12.9   | (9.5-28.5)                                      | 8      | 17.0   | (13.9-27.0)                                     |                 | 0.619        | 0.563        | 0.428        |
|                                                                       | N3  | 9    | 18.4   | (16.3-21.9)                                     | 9      | 19.6   | (13.7-25.2)                                     |                 |              |              |              |
| Placental free estradiol-17 $\beta$ ng/g <sup>†</sup>                 | Con | 9    | 53.2   | (40.1-86.1)                                     | 11     | 50.9   | (42.7-70.3)                                     |                 | 0.830        | 0.396        | 0.616        |
|                                                                       | N3  | 11   | 65.4   | (35.4-82.4)                                     | 10     | 50.6   | (25.5-74.8)                                     |                 |              |              |              |
| Placental conjugated estradiol-17 $\beta$ ng/g <sup>†</sup>           | Con | 9    | 23.3   | (16.0-26.4)                                     | 11     | 19.4   | (17.5-31.7)                                     |                 | 0.192        | 0.609        | 0.800        |
|                                                                       | N3  | 11   | 25.0   | (19.8-34.8)                                     | 10     | 24.6   | (19.9-40.6)                                     |                 |              |              |              |
| Placental free total estrogene ng/g <sup>†</sup>                      | Con | 9    | 190.4  | (128.6-330.8)                                   | 11     | 218.8  | (167.9-278.7)                                   |                 | 0.633        | 0.953        | 0.491        |
|                                                                       | N3  | 11   | 278.3  | (126.3-389.8)                                   | 10     | 234.0  | (111.5-324.0)                                   |                 |              |              |              |
| Placental conjugated total estrogene ng/g <sup>†</sup>                | Con | 9    | 11.8   | (8.7-15.2)                                      | 11     | 11.2   | (10.0-15.0)                                     |                 | 0.979        | 0.984        | 0.920        |
|                                                                       | N3  | 11   | 13.2   | (7.9-14.4)                                      | 10     | 12.4   | (8.0-15.2)                                      |                 |              |              |              |
| Placental testosterone ng/g                                           | Con | 9    | 10.6   | (7.9-16.6)                                      | 11     | 14.8   | (10.2-20.1)                                     |                 | 0.252        | <b>0.008</b> | 0.278        |
|                                                                       | N3  | 11   | 10.7   | (9.7-14.4)                                      | 10     | 19.7   | (16.6-22.6)                                     | 0.249           | <b>0.008</b> | 0.113        | 0.965        |
| Placental progesterone ng/g <sup>†</sup>                              | Con | 9    | 2837.0 | (1398.5-1398.5)                                 | 11     | 3074.0 | (2668.0-3312.0)                                 |                 | 0.926        | 0.452        | 0.400        |
|                                                                       | N3  | 11   | 3432.0 | (2326.0-3980.0)                                 | 10     | 2239.5 | (1413.3-3600.8)                                 |                 |              |              |              |
| Placental free estradiol-17 $\beta$ / testosterone ratio <sup>†</sup> | Con | 9    | 5.0    | (3.0-6.6)                                       | 11     | 4.2    | (2.5-6.1)                                       |                 | 0.398        | <b>0.013</b> | <b>0.045</b> |
|                                                                       | N3  | 11   | 5.7    | (3.6-6.3)                                       | 10     | 2.1    | (1.7-3.7)                                       | 0.719           | <b>0.002</b> | <b>0.042</b> | 0.401        |

Sex steroid hormone data are presented as median with interquartile range (IQR: 25th - 75th percentiles). Statistical significance was calculated by two-way ANOVA with Holm-Sidak *post-hoc* test. †Not normal distributed sex steroid hormone parameters were tested for statistical significance by two-way ANOVA on ranks with Holm-Sidak *post-hoc* test. P, P-value; #, significant effects for sex differences; \*, significant effects for the n-3 LCPUFA treatment; \* #, significant interactions. P < 0.05 are marked in bold. C, control group; I, intervention group; CP, cord plasma; Con-M; placentas of male offspring in the control group; Con-F; placentas of female offspring in the control group; N3-M, placentas of male offspring in the n-3 LCPUFA intervention group, N3-F, placentas of female offspring in the n-3 LCPUFA intervention group.

**Table S9: Correlation analyses for placental mRNA levels of significantly regulated genes with corresponding offspring body composition measurements up to one year.**

|                                                             | LRP6  | DVL1         | PCNA         | CDK6         | HDAC5        | TGFB1 |
|-------------------------------------------------------------|-------|--------------|--------------|--------------|--------------|-------|
| <b>Birth weight</b>                                         |       |              |              |              |              |       |
| <b>Rs</b>                                                   | 0.06  | -0.02        | <b>0.31</b>  | <b>0.33</b>  | 0.06         | -0.15 |
| <b>P</b>                                                    | 0.719 | 0.918        | <b>0.049</b> | <b>0.042</b> | 0.717        | 0.339 |
| <b>N</b>                                                    | 41    | 41           | <b>41</b>    | <b>38</b>    | 41           | 41    |
| <b>Birth weight percentiles</b>                             |       |              |              |              |              |       |
| <b>Rs</b>                                                   | 0.17  | -0.04        | <b>0.36</b>  | <b>0.49</b>  | 0.04         | -0.08 |
| <b>P</b>                                                    | 0.295 | 0.795        | <b>0.023</b> | <b>0.002</b> | 0.826        | 0.607 |
| <b>N</b>                                                    | 41    | 41           | <b>41</b>    | <b>38</b>    | 41           | 41    |
| <b>Ponderal index at birth</b>                              |       |              |              |              |              |       |
| <b>Rs</b>                                                   | -0.06 | 0.03         | 0.16         | -0.02        | -0.05        | -0.23 |
| <b>P</b>                                                    | 0.730 | 0.831        | 0.328        | 0.915        | 0.769        | 0.151 |
| <b>N</b>                                                    | 41    | 41           | 41           | 38           | 41           | 41    |
| <b>Birth weight to birth length ratio</b>                   |       |              |              |              |              |       |
| <b>Rs</b>                                                   | 0.06  | 0.01         | <b>0.32</b>  | 0.26         | 0.04         | -0.19 |
| <b>P</b>                                                    | 0.721 | 0.931        | <b>0.039</b> | 0.111        | 0.825        | 0.232 |
| <b>N</b>                                                    | 41    | 41           | <b>41</b>    | 38           | 41           | 41    |
| <b>Birth weight to placental weight ratio</b>               |       |              |              |              |              |       |
| <b>Rs</b>                                                   | -0.12 | 0.16         | 0.08         | 0.26         | 0.28         | 0.18  |
| <b>P</b>                                                    | 0.471 | 0.325        | 0.626        | 0.111        | 0.079        | 0.250 |
| <b>N</b>                                                    | 41    | 41           | 41           | 38           | 41           | 41    |
| <b>Placental weight</b>                                     |       |              |              |              |              |       |
| <b>Rs</b>                                                   | 0.13  | -0.15        | 0.12         | -0.09        | -0.23        | -0.30 |
| <b>P</b>                                                    | 0.402 | 0.366        | 0.462        | 0.595        | 0.151        | 0.055 |
| <b>N</b>                                                    | 41    | 41           | 41           | 38           | 41           | 41    |
| <b>Body weight at 1 year</b>                                |       |              |              |              |              |       |
| <b>Rs</b>                                                   | 0.03  | <b>0.49</b>  | 0.15         | 0.22         | <b>0.48</b>  | 0.20  |
| <b>P</b>                                                    | 0.834 | <b>0.001</b> | 0.350        | 0.193        | <b>0.002</b> | 0.210 |
| <b>N</b>                                                    | 40    | <b>40</b>    | 40           | 37           | <b>40</b>    | 40    |
| <b>Sum of four skin fold thicknesses (SFT) 3-5 days</b>     |       |              |              |              |              |       |
| <b>Rs</b>                                                   | -0.02 | -0.31        | 0.29         | 0.31         | -0.14        | -0.07 |
| <b>P</b>                                                    | 0.924 | 0.056        | 0.074        | 0.067        | 0.387        | 0.661 |
| <b>N</b>                                                    | 39    | 39           | 39           | 36           | 39           | 39    |
| <b>Sum of four skin fold thicknesses (SFT) 1 year</b>       |       |              |              |              |              |       |
| <b>Rs</b>                                                   | 0.13  | 0.07         | 0.04         | 0.04         | -0.01        | -0.16 |
| <b>P</b>                                                    | 0.422 | 0.665        | 0.832        | 0.802        | 0.956        | 0.336 |
| <b>N</b>                                                    | 40    | 40           | 40           | 37           | 40           | 40    |
| <b>Subcutaneous-to-preperitoneal fat mass ratio 6 weeks</b> |       |              |              |              |              |       |
| <b>Rs</b>                                                   | 0.20  | 0.01         | -0.08        | 0.06         | 0.01         | -0.09 |
| <b>P</b>                                                    | 0.273 | 0.961        | 0.669        | 0.758        | 0.971        | 0.619 |
| <b>N</b>                                                    | 32    | 32           | 32           | 29           | 32           | 32    |
| <b>Subcutaneous-to-preperitoneal fat mass ratio 1 year</b>  |       |              |              |              |              |       |
| <b>Rs</b>                                                   | 0.32  | -0.04        | -0.14        | 0.25         | -0.08        | -0.07 |
| <b>P</b>                                                    | 0.057 | 0.800        | 0.416        | 0.149        | 0.643        | 0.673 |
| <b>N</b>                                                    | 37    | 37           | 37           | 34           | 37           | 37    |

Rs between 0.0 - 0.4 > 0.4 - 0.7 > and 0.7 - 1.0 were considered as weak, moderate and strong correlations, respectively. Positive and negative values indicate positive and inverse correlations. Correlation analysis was conducted independent of n-3 LCPUFA intervention status.  $P < 0.05$  was considered as significant and is marked in bold. Rs, spearman-rho correlation coefficient; P, P-value for the respective correlation.
